# Innovating Urban Mosquito Control: Introducing Human-Controlled Breeding Sites as a Component of Integrated Mosquito Management (IMM)

Guillermo A. Baigorria<sup>1,2</sup> and Consuelo C. Romero<sup>1,2</sup>

<sup>1</sup> Next Season Systems LLC, Department of Research and Development, Lincoln, NE 68506, USA

<sup>2</sup> Gikarix SAC, Department of Research and Development. La Molina, Lima, 15024, Peru

## ABSTRACT:

This study introduces a novel method for mosquito control tailored specifically for urban and suburban areas, addressing their unique challenges. The concept of Human-Controlled Breeding Sites (HCBS) is presented as an innovative approach to reducing mosquito populations by providing controlled oviposition sites within households. The paper is structured into three main components. The first details the meticulous development of the HCBS method, the second explores the intricate development of the HCBS device, crucial for effective implementation of the HCBS approach. Finally, the experiment validating the HCBS methodology is described, offering insights into its practical application and efficacy in mosquito population control. Our proposal emphasizes the importance of considering mosquito needs, behavior and preferences in designing effective mosquito control strategies. Gravid mosquitoes must find a suitable place for oviposition, and HCBS provides an easy-access controlled environment for them to do so within households. Contrary to the commonly current recommendation to destroy all possible locations where mosquitoes can lay their eggs, the HCBS methodology provides an opportunity for gravid mosquitoes to oviposit their eggs without being deterred by chemical odors or dead larvae or pupae. It involves waiting for a timespan before effectively collecting and destroying the individuals in one concerted effort with zero impact on the environment and at minimal cost. Successful deposition of eggs by gravid mosquitoes into HCBS devices, followed by their destruction within the designated timeframe, validates the system's efficacy in disrupting the

mosquito life cycle. Moreover, our findings demonstrate the significant influence of color selection on HCBS effectiveness, with green HCBS devices being the preferred choice, although not an indispensable condition for oviposition. These integrated components offer a comprehensive understanding of the HCBS approach, effectively bridging the gap between methodological development, device design, and practical application. The findings underscore HCBS as a valuable addition to mosquito control strategies, with potential applications in diverse environments. Further research is essential to delve into and model the long-term effectiveness of HCBS, aiming to optimize its design for maximum efficacy and scalability. This includes studying its performance over extended periods and refining the design parameters to enhance its functionality and widespread applicability including the use of disaster risk management systems.

**Keywords:** *Mosquito control, Human-Controlled Breeding Sites (HCBS), Integrated Mosquito Management, Oviposition sites, Vector control methods, Gravid female mosquitoes, Mosquito life cycle, Public health*

## 1. INTRODUCTION:

Climate change has emerged as a significant driver of mosquito population dynamics, contributing to the expansion of mosquito habitats into new geographic regions (Mora, et al., 2022). Rising temperatures, altered precipitation patterns, and changes in humidity create favorable conditions for mosquito breeding and survival, facilitating their spread into previously unaffected areas (Lafferty, 2009). As a result, regions that were once considered free from mosquito-borne diseases are now at risk of transmission due to the establishment of mosquito populations in these newly suitable habitats.

Urbanization exacerbates the impact of climate change on mosquito-borne disease transmission by creating environments conducive to mosquito proliferation. Rapid urban growth, particularly in tropical and subtropical regions, leads to the development of densely populated urban and suburban areas with abundant breeding sites for mosquitoes, such as discarded containers, sewage systems, and stormwater drains (Ananya and Miller, 2021; Guagliardo et al., 2015). The convergence of increased human population density and expanding mosquito populations in urban settings creates ideal conditions for the transmission of diseases like Dengue fever, Malaria, West Nile virus, yellow fever and Zika virus among others.

Traditional mosquito control methods, primarily developed for rural environments with low population density, face significant challenges in urban and suburban areas. The widespread use of chemical insecticides may be impractical or environmentally undesirable in densely populated urban settings, while biological control methods may be less effective due to the limited availability of natural habitats for mosquito predators and parasites (Chadee et al., 2009). Moreover, the heterogeneous and dynamic nature of urban landscapes poses challenges for implementing source reduction and habitat modification strategies.

Addressing the growing threat of mosquito-borne diseases in urban and suburban areas requires the development of innovative and context-specific control methods tailored to urban environments. Integrated approaches that combine novel vector control technologies with community engagement and public health interventions offer promising solutions for mitigating disease transmission in urban settings (Muller et al., 2020). These approaches may include the use of novel larvicides targeting mosquito breeding sites in urban landscapes, deployment of spatial repellents to protect high-risk populations, and implementation of community-based surveillance and response systems to detect and control disease outbreaks.

Efforts to develop and implement new mosquito control methods for urban and suburban conditions must consider the social, economic, and environmental factors that influence disease transmission dynamics in these settings (Bazin and Williams, 2018). Multidisciplinary collaborations between researchers, policymakers, public health authorities, and communities are essential for designing effective and sustainable strategies to reduce the burden of mosquito-borne diseases in urban areas.

The objectives of the present study are:

1. To introduce a novel method for mosquito control specifically designed for urban and suburban areas, addressing the unique challenges these environments present.
2. To present the concept of Human-Controlled Breeding Sites (HCBS) as a new, innovative approach to mosquito population reduction by providing a controlled environment for mosquito females to oviposit their eggs within households.
3. To describe the design and functionality of the Human-Controlled Breeding Site device, emphasizing its potential as a supplementary component of Integrated Mosquito Management (IMM) strategies.
4. To investigate the oviposition preferences of mosquito females by testing multiple colors within the Human-Controlled Breeding Sites devices, aiming to identify the most attractive color for egg-laying and optimize the effectiveness of the control method.

This paper is structured into three main components. In Section 3.1, we detail the meticulous development of the new HCBS method, laying the foundational groundwork for substantiating the subsequent exploration and validation of the HCBS methodology. Section 3.2 delves into the intricate development of the HCBS device, an essential component for

implementing the HCBS approach effectively. Finally, Section 3.3 is dedicated to describing the experiment conducted to validate the HCBS methodology, offering insights into its practical application and efficacy in mosquito population control. Together, these integrated components provide a comprehensive understanding of the HCBS approach, effectively bridging the gap between methodological development, device design, and practical application.

## 2. LITERATURE REVIEW:

Mosquito-borne diseases pose significant threats to public health, particularly in tropical and subtropical regions worldwide. Among the most notorious mosquito-borne illnesses are Dengue fever, Malaria, Yellow Fever, West Nile virus and Zika, which collectively cause millions of cases and thousands of deaths each year (World Health Organization, 2020). Controlling the populations of disease-carrying mosquitoes is crucial for reducing the transmission and burden of these diseases. In this literature review, we explore the biology and behavior of mosquitoes, existing control methods, factors influencing mosquito attraction, and the relationship between mosquito species and disease transmission.

### 2.1 Mosquito Biology and Behavior

Mosquitoes, belonging to the Culicidae family, are small, flying insects characterized by their slender bodies, long legs, and elongated mouthparts adapted for piercing and sucking blood (Clements, 1999). The life cycle of mosquitoes consists of four stages: egg, larva, pupa, and adult.

Male and female mosquitoes exhibit significant differences in their lifespans. Male mosquitoes typically live for up to 10 days (Clements, 1999, Lambert et. al. 2022), while females can survive for a few weeks (Foster and Walker, 2009). Some sources suggest that males live for

1 1-2 weeks (Service, 2012), and females typically live anywhere from two to four weeks (Scott  
2 and Takken, 2012).

3 The primary reason for this difference in lifespan is the distinct roles each gender plays  
4 within the species. Males primarily live to mate and do not play a major role in the reproductive  
5 cycle after mating (Service, 2012). On the other hand, female mosquitoes require extended  
6 periods of life to lay eggs (Clements, 1999).

7 Moreover, the feeding habits of male and female mosquitoes also contribute to their  
8 lifespan differences. Male mosquitoes feed only on plant nectar and sugary liquids, such as fruit  
9 juices and honeydew (Clements, 1999). In contrast, female mosquitoes feed on blood in addition  
10 to plant nectar, which provides the necessary nutrients for egg production (Foster and Walker,  
11 2009).

12 Therefore, the differences in lifespan between male and female mosquitoes can be  
13 attributed to their distinct roles in reproduction and their different feeding habits (Clements,  
14 1999; Foster and Walker, 2009; Service, 2012; Scott and Takken, 2012), although a new study  
15 suggest the lifespan difference can be less (Lambert et al., 2022).

16 Environmental factors significantly influence mosquito biology and behavior, with  
17 temperature, humidity, and the availability of breeding sites playing crucial roles in shaping  
18 mosquito population dynamics and distribution (Hugo et al., 2014; Paaijmans et al., 2009).  
19 Human-related factors, such as urbanization (Durrance-Bagale et al., 2024) and changes in land  
20 use, can also have a substantial impact on mosquito habitats and abundance (Gubler, 2011;  
21 Leisnham et al., 2014). Additionally, characteristics like water type (Sumba et al., 2008), larvae  
22 density (Allan and Kline, 1998; Gimnig et al., 2002; Kiflawi et al., 2003; Koenraadt and Takken,  
23 2003), and even pheromone emissions by conspecific larvae (Chadee, 1993; Sumba et al., 2008)

influence oviposition behavior. However, a common thread among these factors is the necessity of water in all oviposition sites.

## 2.2 Mosquito Control Methods

The World Health Organization (WHO, 2009) advocates for integrated vector management (IVM) and suggests four major strategies: Chemical control involves the use of insecticides to kill mosquito larvae and adults. These variously comprise fogging, residual spraying, larviciding, and autodissemination. However, the emergence of insecticide resistance poses challenges to the effectiveness of chemical control efforts (Hemingway and Ranson, 2000).

Biological control methods harness natural enemies of mosquitoes, such as predators and parasites, to reduce mosquito populations. Predatory fish, such as *Gambusia affinis* (mosquito fish), feed on mosquito larvae and are used in biological control programs (Sota and Mogi, 1992). Additionally, genetically modified mosquitoes are being developed as a novel approach to suppress mosquito populations (Alphey et al., 2002).

Environmental management strategies focus on reducing mosquito breeding sites and modifying habitats to make them less suitable for mosquito development. Source reduction techniques involve eliminating or treating standing water where mosquitoes breed, while habitat modification aims to alter environmental conditions to discourage mosquito proliferation (Heintze et al., 2007).

Personal barrier measures involve using barriers like window screens, mosquito nets, repellents, or protective clothing to prevent mosquito bites.

Integrated Mosquito Management (IMM) emphasizes the coordinated use of multiple control methods tailored to local conditions. Surveillance, larval control, adult control, and community engagement are key components of IMM programs aimed at reducing mosquito populations and disease transmission (World Health Organization, 2019).

## 2.3 Mosquito Attraction and Repellents

Mosquitoes are attracted to their hosts by a combination of visual and chemical cues. Visual cues, such as color, play a role in mosquito attraction. Research suggests that mosquitoes are more attracted to dark colors, possibly due to their increased visibility against contrasting backgrounds (Foster and Hancock, 1994).

Chemical cues, including carbon dioxide (CO<sub>2</sub>) and human body odors, also influence mosquito host-seeking behavior. Mosquitoes are highly sensitive to CO<sub>2</sub>, which is emitted by humans during respiration and serves as a potent attractant for female mosquitoes seeking blood meals (Takken and Knols, 1999). Additionally, human skin odors, such as lactic acid and ammonia, can attract mosquitoes from a distance (Logan et al., 2008).

Various repellents are available to protect against mosquito bites. Synthetic chemicals, such as DEET (N,N-diethyl-meta-toluamide), are widely used and highly effective at repelling mosquitoes (Frances and Cooper, 2005). Plant-derived repellents, such as citronella and eucalyptus oil, offer alternative options for personal protection against mosquito bites (Maia and Moore, 2011).

## 2.4 Mosquito Species and Disease Transmission

Different mosquito species exhibit varying degrees of vector competence for transmitting diseases to humans. *Aedes aegypti* and *Aedes albopictus* are primary vectors of Dengue fever,



Zika virus, West Nile virus and Chikungunya virus, with *Aedes aegypti* being particularly efficient in urban environments (Lambrechts et al., 2010). *Anopheles* mosquitoes are the main vectors of Malaria, transmitting Plasmodium parasites to humans through their blood meals (Sinka et al., 2012).

The relationship between mosquito species and disease transmission is influenced by factors such as vector biology, host preferences, and pathogen development. Understanding the ecology and behavior of mosquito vectors is essential for implementing targeted control measures to reduce disease transmission (Weiss et al., 2019).

## 2.5 Mosquito's oviposition ethology

Mosquito oviposition behavior, influenced by various factors including color preferences and environmental cues, plays a crucial role in the transmission of diseases. Different mosquito species exhibit distinct preferences in color for oviposition sites, often correlating with the diseases they transmit. Understanding these ethological preferences is essential for effective vector control strategies and disease prevention efforts.

### 2.5.1 *Aedes aegypti*:

*Aedes aegypti* is a primary vector of several devastating diseases, including dengue fever, Zika virus, West Nile virus, and chikungunya. Research has shown that *Aedes aegypti* females exhibit a preference for dark colors such as black and brown for oviposition sites (Bentley and Day, 1989). These dark-colored sites often contain stagnant water, such as discarded containers, which serve as breeding grounds for *Aedes* mosquitoes.

### 2.5.2 *Aedes albopictus*:

Another important vector species, *Aedes albopictus*, is associated with the transmission of diseases such as dengue fever, Zika virus, West Nile virus, and chikungunya. Unlike *Aedes aegypti*, *Aedes albopictus* displays a preference for lighter colors like white or light blue for oviposition (Koenraadt et al., 2003). These preferences may vary depending on environmental conditions and habitat characteristics, influencing the distribution of oviposition sites and disease transmission patterns.

### 2.5.3 *Culex pipiens*:

*Culex pipiens* is a widespread mosquito species known for transmitting West Nile virus, a potentially severe neurological disease transmitted to humans and other vertebrate hosts. Studies have indicated that *Culex pipiens* females prefer oviposition sites with high organic content, often found in dark-colored water bodies (Rey et al., 2006).

### 2.5.4 *Anopheles spp.*:

*Anopheles* mosquitoes are vectors of malaria parasites, a life-threatening disease that affects millions of people worldwide. Different species within the *Anopheles* genus may exhibit varying oviposition preferences. For example, *Anopheles gambiae*, a major malaria vector in sub-Saharan Africa, shows a preference for dark-colored oviposition sites (Munga et al., 2006). These sites, often found in natural water bodies like swamps and puddles, provide suitable breeding habitats for *Anopheles* mosquitoes and contribute to the transmission of malaria.

In addition to color preferences, environmental factors such as temperature, humidity, and vegetation also influence mosquito oviposition behavior and disease transmission dynamics. Mosquitoes prefer shaded areas with moderate temperatures and high humidity for oviposition,

as these conditions promote larval survival and development (Lounibos, 2002). Vegetation provides additional shelter and resources, creating ideal habitats for mosquito breeding and disease transmission (Clements, 1999).

#### 2.5.5 *Oviposition radius*

Gravid mosquito females exhibit a remarkable ability to search for suitable oviposition sites, often traveling significant distances and enduring varying environmental conditions to lay their eggs in standing water. The duration and distance traveled by gravid females largely depend on factors such as species, habitat availability, and physiological state. For instance, *Aedes* mosquitoes, vectors of diseases like dengue and Zika, have been observed to travel up to several hundred meters in search of suitable breeding sites, with some individuals capable of flying distances of over a kilometer (Service, 1997). Similarly, *Anopheles* mosquitoes, responsible for transmitting malaria, are known to actively seek out water bodies for oviposition, often traveling several kilometers from their blood-feeding sites (Clements, 1999). Gravid females may spend several days or even weeks in search of suitable oviposition sites, utilizing various sensory cues and environmental cues to guide their behavior (Clements, 1999). This remarkable behavior underscores the importance of effective mosquito control strategies to target breeding sites and minimize the risk of disease transmission.

#### 2.5.6 *Mosquito eggs viability*

Mosquito eggs possess remarkable resilience, capable of surviving in a desiccated state for extended periods. Research indicates that mosquito eggs can remain viable for varying durations without water, depending on species and environmental conditions. For instance, *Aedes* mosquitoes, known vectors of diseases such as dengue and Zika, have been reported to maintain viability for up to several months under favorable conditions (Christophers, 1960).

Similarly, studies on *Anopheles* mosquitoes, responsible for transmitting malaria, suggest that their eggs can endure desiccation for several weeks, retaining the potential for hatching upon rehydration (Service, 1997). This adaptive trait enables mosquito eggs to persist through adverse environmental conditions, contributing to the resilience and persistence of mosquito populations.

Mosquito eggs are typically laid on the surface of standing water, although some species may deposit them on moist substrates near water bodies. The surface location of mosquito eggs serves several crucial functions in the reproductive process. Firstly, positioning the eggs on the water surface provides protection from drowning and predation, as it allows for easy access to atmospheric oxygen for respiration (Clements, 1999). Additionally, the surface tension of the water supports the buoyancy of the eggs, preventing them from sinking and facilitating their development (Clements, 2000).

The exchange of oxygen is vital for the survival and development of mosquito eggs. Like all insect eggs, mosquito eggs require oxygen for respiration during embryonic development. The thin outer layer of the egg, called the chorion, is permeable to gases, allowing oxygen to diffuse into the egg while carbon dioxide is released (Clements, 1999). This exchange of gases through the eggshell is essential for maintaining aerobic respiration and ensuring the viability of the developing embryo.

Various household substances have been identified for their efficacy in destroying mosquito eggs, ranging from natural and environmentally friendly options to chemical compounds with larvicidal properties. Soap disrupts water surface tension, suffocating mosquito eggs, while vinegar creates an inhospitable acidic environment hindering egg development. Essential oils like citronella possess larvicidal properties, deterring egg-laying and destroying existing eggs, and diluted bleach solutions disrupt larvae and egg integrity. Additionally, a thin

layer of vegetable oil forms a barrier on water surfaces, suffocating eggs. However, effectiveness can vary based on factors like concentration and application method, emphasizing the need for caution, especially with chemical-based products, to ensure safety for humans and non-target organisms. (Rajapaksa et al., 2014; Clements, 1999; Maia and Moore, 2011)

## **3. MATERIALS AND METHODS:**

### **3.1 The Human-Controlled Breeding Site (HCBS) method**

The HCBS method represents a proactive approach to controlling mosquito populations through targeted intervention at key stages of the mosquito life cycle. This section delineates the step-by-step methodology for implementing the HCBS method, emphasizing its efficacy in attracting gravid female mosquitoes and disrupting the mosquito reproductive process.

#### *3.1.1 Deployment of HCBS Devices*

The first step in the HCBS method involves the strategic placement of HCBS devices in areas susceptible to mosquito breeding in urban and suburban environments. HCBS devices are positioned at floor level to maximize visibility to flying female mosquitoes while remaining inconspicuous to human observation. The devices are distributed evenly across the target area to ensure comprehensive coverage and efficacy in mosquito population control.

To minimize breeding site competition effectively, two strategies are essential: (a) the elimination of existing breeding sites, and/or (b) the incorporation of other standing water sources into the HCBS system. In the former approach, the nearest breeding site would be the HCBS device, compelling gravid mosquitoes to utilize it exclusively. Conversely, in the latter approach, regulating potential standing water sources to align with the HCBS methodology transforms them into functional HCBS devices.

### 3.1.2 Attracting Gravid Female Mosquitoes

Once installed, HCBS devices are designed to attract gravid female mosquitoes seeking oviposition sites for eggs that must be laid. The design features of the HCBS devices, including a shallow basin and a portion of the water surface covered from light, mimic natural breeding habitats favored by mosquitoes. This strategic design encourages female mosquitoes to lay their eggs in the HCBS devices, thereby initiating the mosquito life cycle within a controlled environment.

### 3.1.3 Removal and Treatment of Water

After a predetermined period, typically 10 days to coincide with the development of mosquito larvae into pupae, the water from the HCBS devices is carefully removed and transferred to a separate container. This step is crucial since if the water is not removed within this timeframe, mosquito pupae will emerge as adults, rendering the method ineffective and inadvertently contributing to mosquito reproduction. Moving forward, it is imperative to explore the feasibility of automating the water replacement process in HCBS devices to mitigate this issue and ensure the continued efficacy of mosquito population control efforts.

### 3.1.4 Destroying and killing the collected eggs, larvae and pupas.

One option to destroy and kill the eggs, larvae and pupas from the HCBS devices, it's to treat it with household substances known for their larvicidal properties. Common substances such as soap, vinegar, essential oils, or bleach are added to the water to destroy mosquito eggs, larvae, and pupae present in the container. This targeted treatment ensures the eradication of mosquito offspring and prevents their proliferation in the environment (see Section 2.5.5).

It is crucial to emphasize that only water should be poured into the HCBS container. If the mosquito female detects traces of other substances, including insecticides or household products discussed previously, there is a risk that she may reject the HCBS device as an oviposition site. This would render the method ineffective and unsuitable for mosquito population control.

In dire scenarios where household substances are unavailable, simply pouring the water from the HCBS device onto a dry surface can effectively eliminate larvae and pupae but not necessary eggs. However, the easiest alternative to kill the individuals on the three stages is just to bury the collected water beneath a few centimeters of soil (in a garden or even a pot), thus ensuring continued mosquito population control.

### *3.1.5 Reinstallation of HCBS Devices*

Following treatment, the HCBS devices are refilled with fresh water and reinstated in their original location.

## **3.2 Considerations taken during the design of the HCBS Device**

The design of the Human-Controlled Breeding Site (HCBS) device was informed by a comprehensive literature review on mosquito ethology and its interactions with humans (Section 2). Understanding the behavior of mosquitoes and their preferences for oviposition sites needs was crucial in developing an effective breeding site for controlling mosquito populations.

### *3.2.1 Shape Design*

The HCBS device was designed with a shallow basin to mimic natural breeding habitats favored by mosquitoes. Its shape allows for a relatively large-exposed water surface, providing

ample space for egg deposition. Additionally, the device incorporates a portion of the water surface covered from light, offering protection to mosquito offspring against potential predators.

### *3.2.2 Color Selection*

Five colors were selected for testing the HCBS device: White, Black, Red, Green, and Blue. Color selection played a significant role in determining the attractiveness of the device to gravid female mosquitoes. The color of the HCBS device was chosen to ensure visibility to mosquito females while remaining semi-hidden to humans. This balance is crucial to ensure that mosquitoes perceive the oviposition site as hidden from predators.

### *3.2.3 Placement and Visibility*

The HCBS device is ideally located at floor level to ensure maximum visibility from flying female mosquitoes seeking oviposition sites. It must be strategically positioned to be visible to mosquito females while remaining semi-hidden from human view, creating the perception of a secure oviposition place away from predators.

### *3.2.4 Additional Features*

To facilitate transportation and maintenance, the HCBS device is equipped with a cap or slicing cover to close the exposed water surface when not in use or during harvesting. This feature ensures the integrity of the breeding site and prevents contamination. Importantly, no insecticides or mosquito-killing devices are added to the water within the HCBS to avoid deterring gravid female mosquitoes from ovipositing.

## **3.3 Experiment design**

The experiment was conducted in Peru, specifically in the department of Lima, within the district of La Molina, which is situated at an altitude of approximately 237 meters above sea



level. Its geographical coordinates are approximately 12.0760° S latitude and 76.9502° W longitude. This region experiences climatic conditions typical of a coastal desert, characterized by moderate temperatures, high relative humidity, and minimal rainfall. During the months of February to May, which coincide with the austral summer, La Molina typically records average temperatures ranging from 22°C to 27°C. Relative humidity levels vary between 60% to 70%. Rainfall is scarce, with an average total annual precipitation of less than 10 millimeters.

The mosquito species commonly found in this area include *Aedes aegypti*, the primary vector for diseases such as dengue, Zika, and chikungunya. Additionally, *Culex quinquefasciatus*, known for transmitting West Nile virus, and *Anopheles* species responsible for malaria transmission, are also prevalent in the region.

The experiment was designed to evaluate the efficacy of Human-Controlled Breeding Site (HCBS) devices in attracting gravid female mosquitoes for oviposition, with a focus on color preference. The HCBS devices were specially designed based on findings from the literature review on mosquito ethology and breeding site preferences. Using 3D printing technology, the devices were fabricated in ABS material in five different colors: white, black, red, green, and blue.

### 3.3.1 Installation and Setup

All HCBS devices were filled to the middle with potable water and installed in the same location, following the specified placement guidelines to ensure maximum visibility to flying female mosquitoes. After 10 days of exposure to mosquito access, the HCBS devices were capped and removed from their location. To minimize potential biases due to the very specific location of each HCBS device within the installation location, the distribution of colors among

HCBS devices was randomly altered at each reinstallation. This process was replicated five times to ensure robustness and reliability of the findings.

### 3.3.2 Data Collection and Analysis

In the laboratory, a count of larvae and pupae from each HCBS device was conducted to evaluate mosquito attraction. Due to equipment constraints, egg counts were not feasible for this experiment, and therefore, only larvae and pupae were included in the tally. After counting, the HCBS devices were refilled with water and reinstalled in their original location.

It's worth noting that in our study, we prioritized assessing the functionality of HCBS rather than eradicating the mosquito population in our test area. Consequently, the eggs, larvae, and pupae were not eradicated after collection; instead, they were transferred to another container to mature into adults and contribute to the ongoing mosquito population in the study area. This approach ensured a consistent supply of adult mosquitoes for testing the effectiveness of HCBS methodology and devices.

### 3.3.3 Laboratory Environment

The installation site was situated inside a laboratory exposed to mosquito access, providing a semi-controlled environment for the experiment (conditions similar to those of a room in a house). This setting allowed for consistent conditions across replicates and minimized external variables that could influence mosquito behavior and oviposition decisions.

## 4. RESULTS AND DISCUSSION:

### 4.1 The design

Figure 1 shows the final design of the HCBS device used in our study whereas Figure 2 shows the different color devices installed during the experiment.

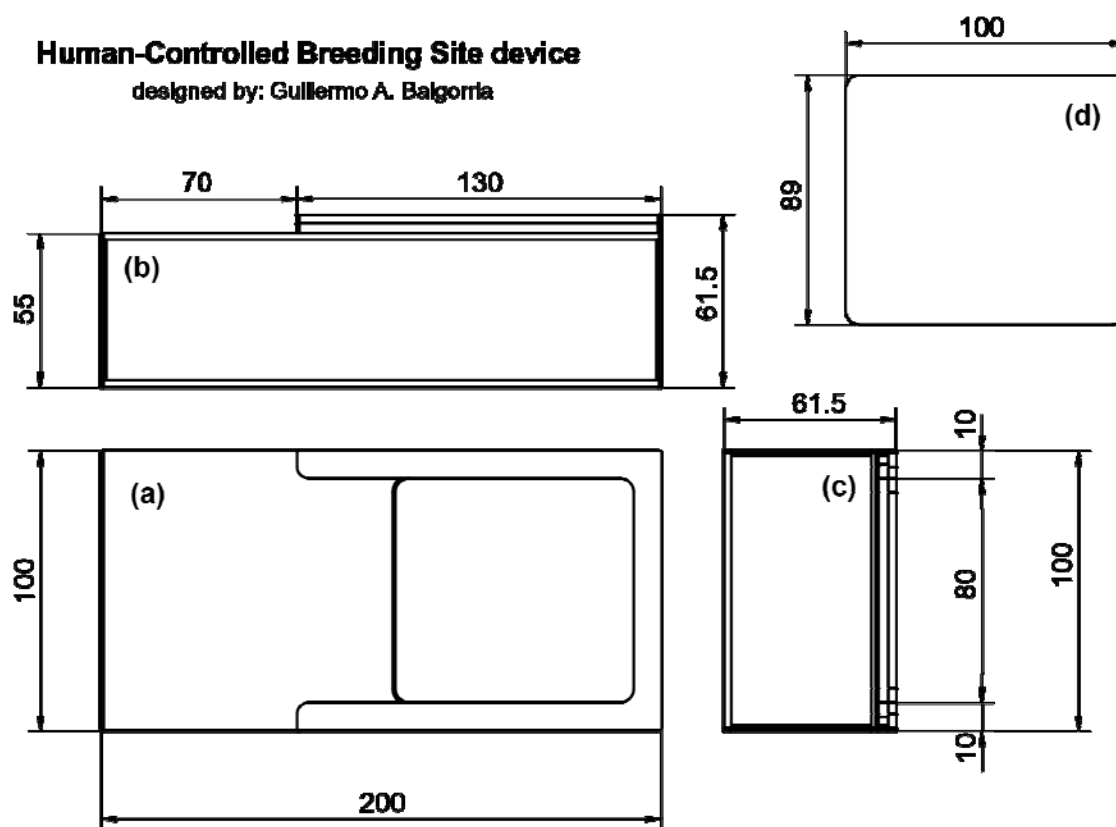

**Figure 1:** Design drawings of the HCBS device, showing (a) top view of the body, (b) side view of the body, (c) front view of the body, and (d) top view of the slicing cap. Measurements are in millimeters (mm).

The slicing cap (d) is placed on the top view of the body (a), enabling slicing between both arms for easy opening and closing of the HCBS device.

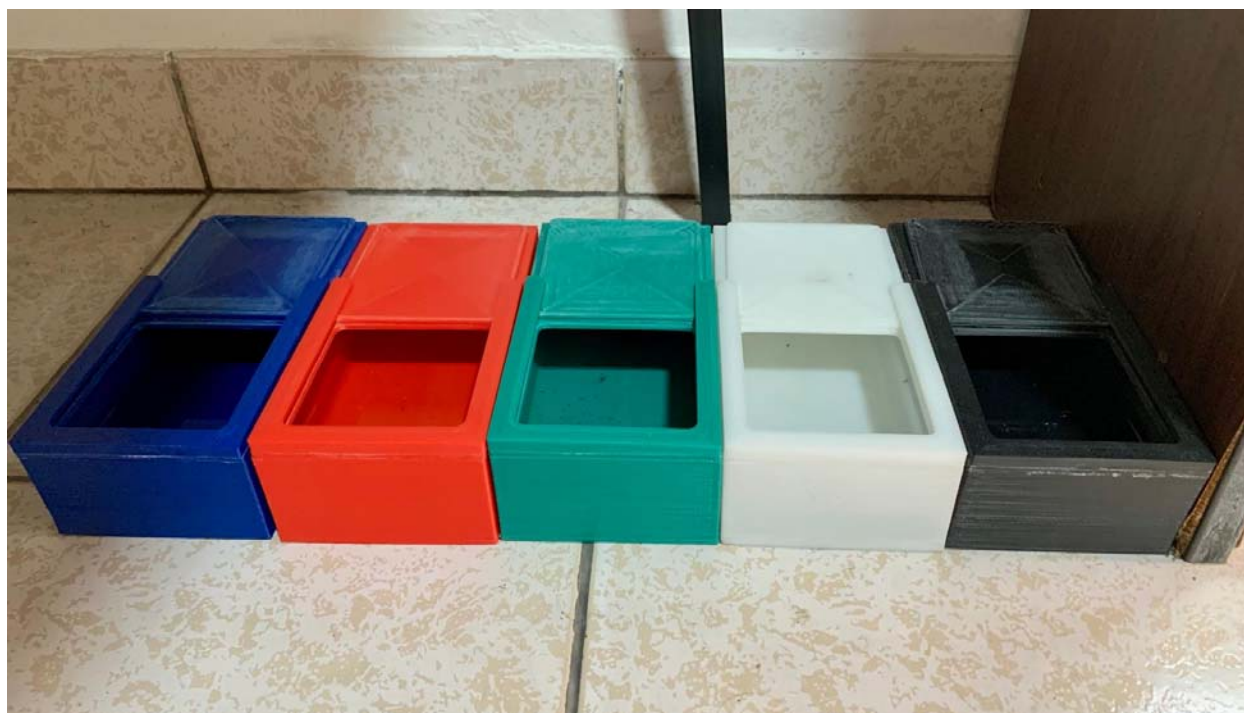

**Figure 2:** Photograph depicting HCBS devices in all colors used during the experiment, installed in their respective locations.

## 4.2 Experiment results

### 4.2.1 Results on the HCBS method

The successful deposition of eggs by gravid mosquitoes into the HCBS devices, followed by the destruction of these individuals within the 10-day timeframe, serves as compelling evidence of the efficacy of the system. This crucial demonstration underscores the functionality of both the HCBS method and device. Without the presence of HCBS devices, these eggs would have inevitably hatched, contributing to the burgeoning mosquito population. Thus, the ability to attract gravid mosquitoes and disrupt their reproductive cycle within the designated timeframe serves as a robust validation of the HCBS system's effectiveness. This innovative approach challenges the commonly current recommendation to destroy all possible locations where

mosquitoes can lay their eggs, providing a controlled environment for oviposition within households while simultaneously reducing mosquito populations at the source.

#### 4.2.2 Results on the HCBS color device

The sampled adult mosquito population from the laboratory revealed that all captured mosquitoes belonged to the *Aedes aegypti* species.

**Table 1:** Number of mosquito's larvae and pupas in the HCBS devices by color and date:

| HCBS<br>device color | Harvesting date        |                        |                      |                      |                      |
|----------------------|------------------------|------------------------|----------------------|----------------------|----------------------|
|                      | April 20 <sup>th</sup> | April 30 <sup>th</sup> | May 10 <sup>th</sup> | May 20 <sup>th</sup> | May 30 <sup>th</sup> |
| Black                | 0                      | 0                      | 0                    | 0                    | 0                    |
| Blue                 | 0                      | 0                      | 0                    | 0                    | 0                    |
| Green                | 2                      | 8                      | 17                   | 15                   | 12                   |
| Red                  | 0                      | 0                      | 0                    | 0                    | 0                    |
| White                | 0                      | 0                      | 0                    | 0                    | 0                    |

After tallying the larvae and pupae across all HCBS devices, a significant statistical difference was observed in the number of specimens collected, particularly between the green HCBS device and those of other colors. This difference can be attributed to mosquitoes' exclusive initial preference for ovipositing in the green device, as detailed in Table 1. Counting ceased after 50 days when no oviposition was detected in HCBS devices of other colors, although the devices remained operational in the laboratory. However, subsequent inspections revealed the presence of larvae in the red HCBS device. Two weeks later, larvae were also found in the white device, followed by the black device a week after, and eventually in the blue device.

Although the counting had already stopped, preventing precise quantification of individuals, it is crucial to note these later observations. These findings suggest that while green is the preferred color for oviposition, it is not an indispensable condition for gravid mosquitoes to oviposit.

The Human-Controlled Breeding Sites (HCBS) method demonstrates remarkable efficacy in controlling mosquito populations, exerting influence over three of the four life stages of mosquitoes. Our findings confirm that when HCBS is correctly applied, it achieves a 100% effectiveness in disrupting the mosquito life cycle by collecting laid egg and eliminating all together with larvae and pupae previously hatched.

One of the key advantages of HCBS is its low implementation cost, which promotes widespread citizen participation in mosquito reduction campaigns. This cost-effectiveness not only encourages community engagement but also facilitates the scalability of mosquito control efforts in urban and suburban areas.

In the event of massive HCBS deployment in urban and suburban environments, a significant reduction in mosquito populations can be anticipated. By disrupting reproduction, HCBS ensures that the current adult mosquito population will be the last local generation. Within a short timeframe, typically within 1 week to 10 days, the absence of male mosquitoes prevents fertilization, effectively limiting the population's ability to replenish since only unfertilized female mosquitoes would theoretically remain alive after this period.

While the primary focus of HCBS implementation is in urban and suburban areas, its potential applicability in rural settings warrants consideration. Gravid female mosquitoes tend to seek the closest and safest place to lay their eggs. With HCBS devices installed within or around houses, mosquitoes are likely to prefer ovipositing in the HCBS rather than expending energy to find distant natural environments where predators exist (see Section 2.5.5). Although its

effectiveness may be somewhat diminished compared to urban areas, HCBS still serves to reduce local mosquito populations and disrupt the feedback loop of mosquito repopulation in natural environments.

Our study also identifies the importance of device color selection in optimizing HCBS effectiveness. Among the colors tested, green HCBS devices consistently demonstrated the highest efficacy in attracting gravid female mosquitoes for oviposition; however, it is not an indispensable condition. Additionally, HCBS devices must have a portion of the water surface shielded from light. This feature makes female mosquitoes more likely to select this device for oviposition, as it offers protection for their offspring against predators. This issue was verified during the retrieval and counting of the individuals collected in the laboratory. When the slicing cap of the HCBS device was opened under the lights, all larvae swiftly moved towards the shaded water within the device. This finding underscores the importance of considering mosquito behavior and preferences in the design of effective mosquito control strategies.

Overall, the findings of this study underscore the potential of HCBS as a valuable addition to Integrated Mosquito Management strategies, particularly in urban and suburban settings. By targeting multiple life stages of mosquitoes and incorporating features that enhance attractiveness and efficacy, HCBS offers a promising approach to reducing mosquito populations and mitigating the transmission of mosquito-borne diseases in diverse environments. Further research and field trials are warranted to explore the long-term effectiveness and scalability of HCBS implementation in different geographic contexts. Additionally, optimizing the design of HCBS devices warrants attention to maximize their efficacy and applicability. Finally, the HCBS method can undergo evaluation for potential application in combating other insect-borne vector diseases.

One suggestion is to leverage disaster risk management systems capable of widespread communication via SMS text messages to convey crucial information to residents in a specific area. The proposal involves utilizing a country's system to coordinate the simultaneous installation of HCBS devices across the entire community or city. Similarly, on the 10<sup>th</sup> day, residents would receive alerts prompting them to harvest and reinstall the HCBS devices. This approach ensures uniform implementation of control programs throughout the community, reminding residents simultaneously to remove the devices to mitigate the negative effects discussed in Section 3.3.3.

## 5. CONCLUSIONS

The Human-Controlled Breeding Site (HCBS) methodology is a groundbreaking approach that diverges from the common recommendation to eliminate all potential mosquito egg-laying sites. Instead, it creates controlled breeding sites to attract female mosquitoes for oviposition. Since humans oversee these sites, the eggs, larvae, and pupae can be effectively being mechanically destroyed before maturing into adult mosquitoes. HCBS proves to be a highly effective method for controlling mosquito populations due to its ability to intervene in multiple stages of the mosquito life cycle. By targeting three out of the four stages of mosquito development, HCBS offers a comprehensive approach to mosquito control that can significantly reduce mosquito populations and mitigate disease transmission in urban and suburban areas. HCBS provides a controlled environment within households where mosquito females can oviposit their eggs. By attracting gravid females to lay their eggs in the breeding site, HCBS devises effectively intercepts the first stage of mosquito development, preventing eggs from being laid in natural breeding habitats. Considering that the mosquito's life cycle in a water environment from egg to pupa has a timespan of around 10 days, at the time the HCBS is



harvested, it will contain individuals in all the three stages from eggs to pupas. At the time the water is discharged from the HCBS device, all the individuals collected are killed at once.

Although HCBS primarily targets the egg, larval, and pupal stages of the mosquito life cycle, it complements existing mosquito control methods that focus on adult mosquitoes. By intervening in multiple stages of mosquito development, HCBS provides a holistic approach to mosquito control that enhances the effectiveness of Integrated Mosquito Management (IMM) strategies. Additionally, the localized nature of HCBS allows for targeted control efforts in areas with high mosquito abundance or disease transmission, contributing to a more efficient and sustainable mosquitoes control programs.

The HCBS device developed in this study played a pivotal role in facilitating the scientific experimentation of the HCBS method, offering insights into critical factors such as color selection for enhancing system efficiency. However, the paramount aspect lies in the adaptability of the HCBS methodology, as any household receptacle capable of retaining water for over 10 days can serve as an HCBS device (e.g., cups, big-mouth bottles, dishes, etc.). When considering alternative household HCBS devices, key considerations include color, shading, and total water surface area exposed to attract gravid mosquitoes for oviposition. It is important to remember that eggs must be laid, and gravid mosquitoes require standing water for this purpose, with no preferred options being available for their reproduction, any source will do. If we control the source, then we control the reproduction of those mosquitoes.

In dire scenarios where household substances are unavailable, simply pouring the water from the HCBS device onto a dry surface can effectively eliminate larvae and pupae but not necessary eggs. However, the easiest alternative to kill the individuals on the three stages is just

to bury the collected water beneath a few centimeters of soil in a garden or pot, ensuring continued mosquito population control.

In conclusion, this study presents a promising methodology for mosquito population control through HCBS methodology especially for urban and suburban areas. By providing a sustainable and effective means of reducing mosquito populations, especially in areas endemic to diseases like dengue fever, yellow fever, West Nile virus, Zika, and others, we envision a substantial contribution to global health initiatives. Implementing this innovative approach on a larger scale holds the potential to significantly mitigate the burden of mosquito-borne diseases worldwide, enhancing public health outcomes and promoting sustainable development.

## COMPETING INTERESTS

The authors declare no competing interest.

## ACKNOWLEDGMENTS

The authors acknowledge the use of generative AI technology ChatGPT 3.5. to improve the paper's reading.

## REFERENCES

- Allan, S.A. and Kline, D.L. (1998). Larval rearing water and pre-existing eggs influence oviposition by *Aedes aegypti* and *Ae. albopictus* (Diptera: Culicidae). *J. Med. Entomol.* 35:943–947.
- Alphey, L., Beard, C.B., Billingsley P., Coetzee, M., Crisanti, A., Curtis, C., Eggleston, P., Godfray, C., Hemingway, J., Jacobs-Lorena, M., James, A.A., Kafatos, F.C., Mukwaya, L.G., Paton, M., Powell, J.R., Schneider, W., Scott, T.W., Sina, B., Sinden, R., Sinkins, S., Spielman, A., Touré, Y. and Collins, F.H. (2002) Malaria control with genetically

manipulated insect vectors. *Science*. 298(5591):119-21. doi:10.1126/science.1078278.  
PMID: 12364786.

Ananya, J. and Miller, C. (2021). Review of machine learning techniques for mosquito control in urban environments. *Ecological Informatics*. 61(2021) 101241.  
doi:<https://doi.org/10.1016/j.ecoinf.2021.101241>

Bazin, M. and Williams, C.R. (2018), Mosquito traps for urban surveillance: collection efficacy and potential for use by citizen scientists. *Journal of Vector Ecology*, 43: 98-103.  
doi:<https://doi.org/10.1111/jvec.12288>

Bentley, M.D. and Day, J.F. (1989). Chemical ecology and behavioral aspects of mosquito oviposition. *Annual Review of Entomology*, 34(1), 401-421.

Chadee, D.D. (1993). Oviposition response of *Aedes aegypti* (L.) to the presence of conspecific eggs in the field in Trinidad, W.I. *J. Fl. Med. Assoc.* 64:63–66.

Chadee, D.D., Martinez, R. and Teklehaimanot, A. (2009). Factors influencing the spatial distribution of *Aedes aegypti* and *Culex quinquefasciatus* (Diptera: Culicidae) in a mixed residential–industrial area in Trinidad. *Revista Panamericana de Salud Pública*, 25(2), 142-151.

Christophers, S.R. (1960). *Aedes aegypti* (L.) the Yellow Fever Mosquito. Cambridge University Press.

Clements, A.N. (1999). *The Biology of Mosquitoes: Sensory Reception and Behaviour* (Vol. 2). CABI.

Clements, A.N. (2000). *The Biology of Mosquitoes: Development, Nutrition and Reproduction* (Vol. 1). CABI.

- 1 Durrance-Bagale, A., Hoe, N., Lai, J., Liew, J.W.K., Clapham, H. and Howard, N. (2024)
- 2 Dengue vector control in high-income, city settings: A scoping review of approaches and
- 3 methods. PLoS Negl Trop Dis 18(4): e0012081.
- 4 doi:<https://doi.org/10.1371/journal.pntd.0012081>
- 5 Frances, S.P. and Cooper, R.D. (2005). Personal protection measures against mosquitoes:
- 6 Insecticide-treated nets and repellents. Insect Science, 12(4), 289-297.
- 7 Foster, W.A. and Hancock, R.G. (1994). Nectar-related olfactory and visual attractants for
- 8 mosquitoes. Journal of the American Mosquito Control Association, 10(3), 288-296.
- 9 Foster, W.A. and Takken, W. (2004). Nectar-related vs. human-related volatiles: behavioural
- 10 response and choice by female and male *Anopheles gambiae* (Diptera: Culicidae)
- 11 between emergence and first feeding. Bulletin of Entomological Research, 94(2), 145-
- 12 157.
- 13 Foster, W.A. and Walker, E.D. (2009). Mosquitoes (Culicidae). In: Mullen, G., and Durden, L.
- 14 (eds) Medical and Veterinary Entomology. Academic Press, pp. 207–259.
- 15 Gimnig, J.E., Ombok, M., Otieno, S., Kaufman, M., Vulule, J.M. and Walker, E.D. (2002).
- 16 Density-dependent development of *Anopheles gambiae* (Diptera: Culicidae) larvae in
- 17 artificial habitats. *J. Med. Entomol.* 39:162–172.
- 18 Guagliardo, S.A., Morrison, A.C., Barboza, J.L., Requena, E. and Astete, H. (2015). Patterns of
- 19 geographic expansion of *Aedes aegypti* in the Peruvian Amazon. PLoS Neglected
- 20 Tropical Diseases, 9(5), e0004045.
- 21 Gubler, D.J. (2011). Dengue, urbanization and globalization: the unholy trinity of the 21(st)
- 22 century. Tropical Medicine and Health, 39(4 Suppl), 3-11.

Heintze, C., Garrido, M.V., Kroeger, A. and Whatley, A. (2007). Density-dependent host choice of disease vectors—its epidemiological implications. *Parasites and Vectors*, 1(1), 1-12.

Hemingway, J. and Ranson, H. (2000). Insecticide resistance in insect vectors of human disease. *Annual Review of Entomology*, 45(1), 371-391.

Hribar, L.J. and Leal, W.S. (2002). Oviposition behavior of *Toxorhynchites rutilus* and *Toxorhynchites violaceus*: responses to organic infusions. *Journal of the American Mosquito Control Association*, 18(1), 49-54.

Hugo, L.E., Jeffery, J.A., Trewin, B.J., Wockner, L.F., Thi Yen, N., Le, N.H., Nghia, L.T., Hine, E., Ryan P.A. and Kay, B.H. (2014). Adult survivorship of the dengue mosquito *Aedes aegypti* varies seasonally in central Vietnam. *PLOS neglected tropical diseases*. 8(2): e2669. doi:<https://doi.org/10.1371/journal.pntd.0002669>.

Juliano, S.A. (2009). Species interactions among larval mosquitoes: context dependence across habitat gradients. *Annual Review of Entomology*, 54, 37-56.

Kiflawi, M., Blaustein, L. and Mangel, M. (2003). Oviposition habitat selection by the mosquito *Culiseta longiareolata* in response to risk of predation and conspecific larval density. *Ecol. Entomol.* 28:168–173.

Koenraadt, C.J.M. and Takken, W. (2003). Cannibalism and predation among larvae of *Anopheles gambiae* complex. *Med. Vet. Entomol.* 17:61–66.

Koenraadt, C.J.M., Takken, W. and Dicke, M. (2003). The potential role of spectral composition of visual cues for the host-seeking behaviour of mosquitoes. *Entomologia Experimentalis et Applicata*, 108(1), 1-7.

- 1 Lafferty, K.D. (2009). The ecology of climate change and infectious diseases. *Ecology*, 90(4),  
2 888-900.
- 3 Lambert, B., North, A., Charles, H. and Godfray, J., (2022). A meta-analysis of longevity  
4 estimates of mosquito vector of disease. *BioRxiv* 2022.05.30.494059.  
5 doi:<https://doi.org/10.1101/2022.05.30.494059>.
- 6 Lambrechts, L., Scott, T.W. and Gubler, D.J. (2010). Consequences of the expanding global  
7 distribution of *Aedes albopictus* for dengue virus transmission. *PLoS Neglected Tropical*  
8 *Diseases*, 4(5), e646.
- 9 Leisnham, P.T., LaDeau, S.L. and Juliano, S.A. (2014). Spatial and temporal habitat segregation  
10 of mosquitoes in urban Florida. *PLoS ONE* 9(3): e91655.  
11 doi:[10.1371/journal.pone.0091655](https://doi.org/10.1371/journal.pone.0091655)
- 12 Logan, J.G., Birkett, M.A. and Semiochemicals, S. (2008). Semiochemicals for biting fly  
13 control: Their identification and exploitation. *Pest Management Science*, 64(6), 647-654.
- 14 Lounibos, L.P. (2002). Invasions by insect vectors of human disease. *Annual Review of*  
15 *Entomology*, 47(1), 233-266.
- 16 Maia, M.F. and Moore, S.J. (2011). Plant-based insect repellents: a review of their efficacy,  
17 development and testing. *Malaria Journal*, 10(1), S11.
- 18 Mora, C., McKenzie, T., Gaw, I.M., Dean, J.M., von Hammerstein, H., Knudson, T.A., Setter,  
19 R.O., Smith, C.Z., Webster, K.M., Patz, J.A. and Franklin, E.C. (2022). Over half of  
20 known human pathogenic diseases can be aggravated by climate change. *Nature Climate*  
21 *Change*. 2022. pmid:35968032. doi: <https://doi.org/10.1038/s41558-022-01426-1>.

- 1 Muller, G.C., Kravchenko, V.D., Schlein, Y. and Booth, M. (2020). Urban mosquito
- 2 management: an adaptive and integrated approach. *Journal of Vector Ecology*, 45(2), 129-
- 3 140.
- 4 Munga, S., Minakawa, N., Zhou, G., Barrack, O.O., Githeko, A.K. and Yan, G. (2006).
- 5 Oviposition site preference and egg hatchability of *Anopheles gambiae*: effects of land
- 6 cover types. *Journal of Medical Entomology*, 43(1), 27-34.
- 7 Paaajmans, K.P., Blanford, S., Bell, A.S., Blanford, J.I., Read, A.F. and Thomas, M.B. (2009).
- 8 Influence of climate on malaria transmission depends on daily temperature variation.
- 9 *Proceedings of the National Academy of Sciences*, 107(34), 15135-15139.
- 10 Rajapaksa, P., Rodrigo, W. and Fernando, S. (2014). Current status of insecticide resistance and
- 11 mechanisms involved in the temephos selected *Aedes aegypti* (L.) from Sri Lanka.
- 12 *Parasites and Vectors*, 7(1), 1-11.
- 13 Rey, J.R., Nishimura, N., Wagner, B. and Braks, M.A. (2006). Oviposition site selection by the
- 14 dengue vector *Aedes aegypti* and its implications for dengue control. *Annals of the New*
- 15 *York Academy of Sciences*, 1081(1), 328-332.
- 16 Service, M.W. (1997). *Mosquito Ecology: Field Sampling Methods*. Elsevier.
- 17 Service, M.W. (2012). *Medical Entomology for Students*. Cambridge University Press.
- 18 Sinka, M.E., Bangs, M.J., Manguin, S., Coetzee, M., Mbogo, C. M., Hemingway, J., Patil, A.P.,
- 19 Temperly, W.H., Gething, P.W., Kabaria, C.W., Okara, R.M., van Boeckel, T., Godfray,
- 20 H.C.J., Harbach, R.E. and Hay, S.I. (2012). The dominant *Anopheles* vectors of human
- 21 malaria in Africa, Europe and the Middle East: occurrence data, distribution maps and
- 22 bionomic précis. *Parasites and Vectors*, 5(1), 1-34.

1 Scott, T.W. and Takken, W. (2012). Feeding strategies of anthropophilic mosquitoes result in  
2 increased risk of pathogen transmission. *Trends in Parasitology*, 28(3), 114-121.

3 Sumba, L.A., Ogbunugafor, C.B., Deng, A.L. and Hassanali, A., (2008) Regulation of  
4 Oviposition in *Anopheles gambiae* s.s.: Role of Inter- and Intra-Specific Signals. *J Chem*  
5 *Ecol* 34, 1430–1436. <https://doi.org/10.1007/s10886-008-9549-5>.

6 Takken, W. and Knols, B.G. (1999). Odor-mediated behavior of Afrotropical malaria mosquitoes.  
7 *Annual Review of Entomology*, 44(1), 131-157.

8 Verhulst, N.O., Takken, W. and Dicke, M. (2010). Schreckstoff in vertebrates: conserved  
9 evolution and candidate chemosensory receptors. *Chemoecology*, 20(2), 119-130.

10 Weiss, D.J., Lucas, T.C.D., Nguyen, M., Nandi, A.K., Bisanzio, D., Battle, K.E., Cameron, E.,  
11 Twohig, K.A., Pfeffer, D.A., Rozier, J.A., Gibson, H.S., Rao, P.C., Casey, D., Bertozzi-  
12 Villa, A., Collins, E.L., Dalrymple, U., Gray, N., Harris, J.R., Howes, R.E., Kang, S.Y.,  
13 Keddie, S.H., May, D., Rumisha, S., Thorn, M.P., Barber, R., Fullman, N., Huynh, C.K.,  
14 Kulikoff, X., Kutz, M.J., Lopez, A.D., Mokdad, A.H., Naghavi, M., Nguyen, G.,  
15 Shackelford, K.A., Vos, T., Wang, H., Smith, D.L., Lim, S.S., Murray, C.J.L., Bhatt, S.,  
16 Hay, S.I. and Gething, P.W. (2019). Mapping the global prevalence, incidence, and  
17 mortality of *Plasmodium falciparum*, 2000-17: a spatial and temporal modelling study.  
18 *Lancet*, 394(10195):322-331. doi: 10.1016/S0140-6736(19)31097-9.

19 World Health Organization. (2019). Handbook for Integrated Vector Management. World Health  
20 Organization.

21 World Health Organization (WHO) and the Special Programme for Research and Training in  
22 Tropical Diseases (TDR), (2009). Dengue guidelines, for diagnosis, treatment, prevention



- 1 and control.; WHO Press. 147 p. ISBN: 9789241547871. (available at:
- 2 [https://iris.who.int/bitstream/handle/10665/44188/9789241547871\\_eng.pdf?sequence=1](https://iris.who.int/bitstream/handle/10665/44188/9789241547871_eng.pdf?sequence=1)).
- 3 World Health Organization. (2020). Vector-borne diseases. Retrieved from
- 4 <https://www.who.int/news-room/fact-sheets/detail/vector-borne-diseases>
